# Supplementary figures and images for: Detection of the cell viability and proliferation using two-signal electrochemical method
Source: Royal Society of Chemistry journal article supplement (doi:10.1039/c2an35076a), 2012-01-01

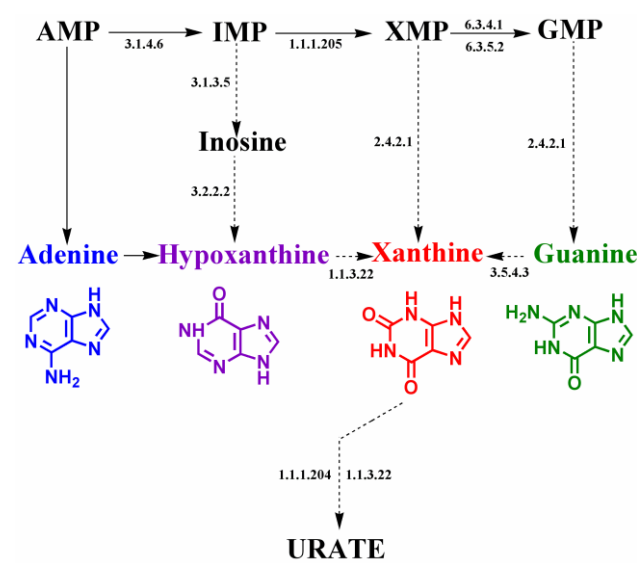

Fig. 1S†

Supplement: c2an35076a.pdf [file c2an35076a.pdf]
